# Supplementary material
Source: publisher figshare collection journal article supplement (https://tandf.figshare.com/articles/dataset/_/6755159)
Supplement: Supplementary file 1 [file 2]

## Supplementary Information

### Invertebrate drift densities in the Njoro and Kamweti Rivers in the Kenyan highlands that differ in the level of anthropogenic disturbances

Charles M M'Erimba, John G Mbaka, Priscilla W Mureithi and Ken O Ouma  
African Zoology 2018. <https://doi.org/10.1080/15627020.2018.1473795>

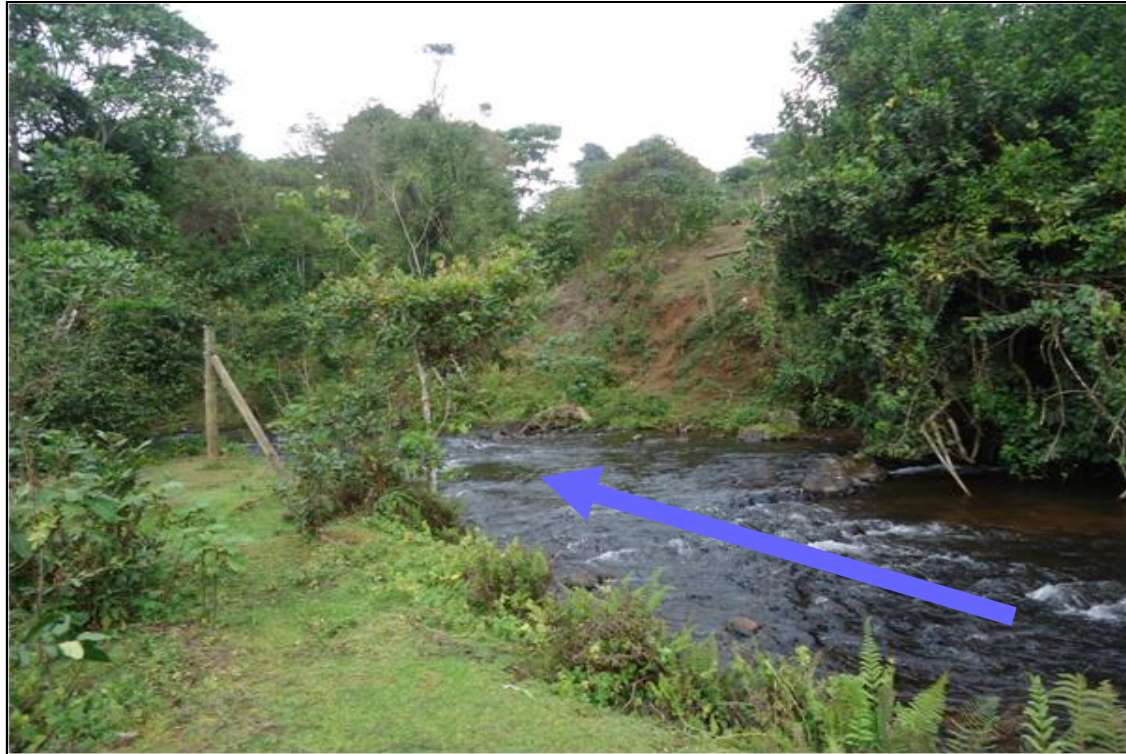

**Figure S1:** The reach sampled at the Kamweti River. The blue arrow shows the direction of water flow.

**Table S1:** Sampling dates at the Njoro and Kamweti Rivers

| River   | Sampling months                                    |                     |
|---------|----------------------------------------------------|---------------------|
|         | February                                           | March               |
| Njoro   | 27/2/2016; 28/2/2016                               | 6/3/2016; 28/3/2016 |
| Kamweti | 1/3/2016; 2/3/2016; 8/3/2016; 15/3/2016; 29/3/2016 |                     |

**Table S2:** Mean ( $\pm$  SE) densities (individuals m<sup>-3</sup>) of drifting invertebrates at the Kamweti River during day and night time (minutes) intervals

| Family               | Kamweti River |             |               |             |             |             |             |             |             |               |
|----------------------|---------------|-------------|---------------|-------------|-------------|-------------|-------------|-------------|-------------|---------------|
|                      | Day           |             |               |             |             | Night       |             |             |             |               |
|                      | Time (min)    | 5           | 10            | 15          | 20          | 25          | 5           | 10          | 15          | 20            |
| Chironomidae         | 1.3 (0.6)     | 0.5 (0.2)   | 0.6 (0.2)     | 0.6 (0.2)   | 0.4 (0.2)   | 0.7 (0.3)   | 0.3 (0.1)   | 0.5 (0.2)   | 0.3 (0.1)   | 0.2 (0.1)     |
| Baetidae             | 10.1 (1.8)    | 5.1 (1.1)   | 4.4 (1.0)     | 2.8 (0.4)   | 2.9 (0.5)   | 16.8 (5.0)  | 11.2 (4.6)  | 4.1 (1.4)   | 3.5 (0.9)   | 3.6 (0.9)     |
| Simuliidae           | 0 (0)         | 0.04 (0.02) | 0 (0)         | 0.01 (0.01) | 0.07 (0.06) | 0.08 (0.07) | 0.03 (0.02) | 0 (0)       | 0.01 (0.01) | 0.03 (0.02)   |
| Caenidae             | 0 (0)         | 0 (0)       | 0.01 (0.01)   | 0.03 (0.02) | 0.01 (0.01) | 0 (0)       | 0.04 (0.03) | 0 (0)       | 0.03 (0.02) | 0 (0)         |
| Elmidae              | 0.4 (0.1)     | 0.2 (0.1)   | 0.1 (0.03)    | 0.2 (0.09)  | 0.08 (0.02) | 0.07 (0.06) | 0.21 (0.07) | 0.1 (0.08)  | 0.4 (0.2)   | 0.1 (0.05)    |
| Culicidae            | 0.04 (0.04)   | 0.02 (0.01) | 0.02 (0.01)   | 0 (0)       | 0 (0)       | 0 (0)       | 0 (0)       | 0 (0)       | 0 (0)       | 0.1 (0.07)    |
| Hydropsychidae       | 0.03 (0.02)   | 0.02 (0.01) | 0 (0)         | 0.02 (0.01) | 0.02 (0.01) | 0.02 (0.01) | 0 (0)       | 0 (0)       | 0 (0)       | 0.03 (0.02)   |
| Ceratopogonidae      | 0 (0)         | 0 (0)       | 0 (0)         | 0 (0)       | 0 (0)       | 0 (0)       | 0 (0)       | 0 (0)       | 0 (0)       | 0 (0)         |
| Coenagrionidae       | 0 (0)         | 0 (0)       | 0.004 (0.003) | 0 (0)       | 0 (0)       | 0 (0)       | 0 (0)       | 0 (0)       | 0 (0)       | 0.005 (0.004) |
| Libellulidae         | 0 (0)         | 0.01 (0.01) | 0 (0)         | 0 (0)       | 0 (0)       | 0 (0)       | 0 (0)       | 0 (0)       | 0 (0)       | 0 (0)         |
| Gyrinidae            | 0 (0)         | 0 (0)       | 0 (0)         | 0 (0)       | 0 (0)       | 0 (0)       | 0 (0)       | 0 (0)       | 0 (0)       | 0 (0)         |
| Leptoceridae         | 0.1 (0.1)     | 0.08 (0.06) | 0.04 (0.02)   | 0.01 (0.01) | 0.02 (0.01) | 0.06 (0.06) | 0 (0)       | 0.04 (0.03) | 0.02 (0.01) | 0 (0)         |
| Hydraenidae          | 0 (0)         | 0 (0)       | 0 (0)         | 0 (0)       | 0 (0)       | 0 (0)       | 0 (0)       | 0 (0)       | 0 (0)       | 0 (0)         |
| Pyalidae             | 0 (0)         | 0.03 (0.03) | 0 (0)         | 0 (0)       | 0 (0)       | 0 (0)       | 0 (0)       | 0 (0)       | 0 (0)       | 0 (0)         |
| Hydrophilidae        | 0 (0)         | 0 (0)       | 0 (0)         | 0 (0)       | 0 (0)       | 0 (0)       | 0 (0)       | 0 (0)       | 0 (0)       | 0 (0)         |
| Helodidae            | 0.5 (0.3)     | 0.12 (0.04) | 0.2 (0.07)    | 0.2 (0.05)  | 0.09 (0.03) | 0.4 (0.2)   | 0.2 (0.1)   | 0.03 (0.02) | 0.2 (0.1)   | 0.1 (0.07)    |
| Dysticidae           | 0.06 (0.06)   | 0 (0)       | 0 (0)         | 0 (0)       | 0 (0)       | 0 (0)       | 0 (0)       | 0 (0)       | 0 (0)       | 0 (0)         |
| Veliidae             | 0 (0)         | 0.01 (0.01) | 0 (0)         | 0 (0)       | 0.01 (0.01) | 0 (0)       | 0.03 (0.02) | 0.02 (0.01) | 0.02 (0.01) | 0 (0)         |
| Tipulidae            | 0 (0)         | 0 (0)       | 0 (0)         | 0.02 (0.01) | 0 (0)       | 0 (0)       | 0.04 (0.02) | 0.04 (0.04) | 0 (0)       | 0 (0)         |
| Heptagenidae         | 0.2 (0.08)    | 0.2 (0.09)  | 0.2 (0.1)     | 0.07 (0.05) | 0.04 (0.02) | 0.4 (0.3)   | 0.2 (0.08)  | 0.02 (0.01) | 0.1 (0.06)  | 0.1 (0.05)    |
| Dixidae              | 0 (0)         | 0 (0)       | 0.01 (0.01)   | 0 (0)       | 0 (0)       | 0 (0)       | 0 (0)       | 0 (0)       | 0 (0)       | 0 (0)         |
| Aeshnidae            | 0 (0)         | 0 (0)       | 0 (0)         | 0 (0)       | 0 (0)       | 0 (0)       | 0 (0)       | 0 (0)       | 0 (0)       | 0 (0)         |
| Others               | 0.5 (0.2)     | 0.5 (0.2)   | 0.4 (0.1)     | 0.2 (0.06)  | 0.4 (0.1)   | 2.4 (1.3)   | 0.7 (0.3)   | 0.3 (0.2)   | 0.6 (0.1)   | 0.5 (0.2)     |
| Overall mean density | 0.6 (0.1)     | 0.3 (0.06)  | 0.3 (0.05)    | 0.2 (0.03)  | 0.2 (0.02)  | 0.9 (0.3)   | 0.5 (0.2)   | 0.2 (0.07)  | 0.2 (0.05)  | 0.2 (0.05)    |

**Table S3:** Mean ( $\pm$  SE) densities (individuals m<sup>-3</sup>) of drifting invertebrates at the Njoro River during day and night time (minutes) intervals

| Family               | Njoro River |             |             |             |             |             |            |           |             |             |
|----------------------|-------------|-------------|-------------|-------------|-------------|-------------|------------|-----------|-------------|-------------|
|                      | Day         |             |             |             |             | Night       |            |           |             |             |
| Time                 | 5           | 10          | 15          | 20          | 25          | 5           | 10         | 15        | 20          | 25          |
| Chironomidae         | 34.3 (7.3)  | 20.1 (3.1)  | 17.2 (3.2)  | 17.6 (2.8)  | 12.4 (2.1)  | 19.5 (5.9)  | 10.8 (1.8) | 7.6 (1.7) | 13.7 (3.6)  | 5.5 (1.5)   |
| Baetidae             | 22.3 (3.0)  | 9.6 (2.7)   | 0.7 (1.8)   | 7.4 (2.4)   | 5.4 (1.0)   | 18.6 (6.2)  | 9 (2.4)    | 6.3 (1.1) | 7.7 (1.8)   | 5.5 (1.3)   |
| Simuliidae           | 1.3 (0.5)   | 1.8 (0.6)   | 1.2 (0.4)   | 1.2 (0.5)   | 0.4 (0.2)   | 1.9 (0.6)   | 0.4 (0.3)  | 0.4 (0.2) | 0.2 (0.1)   | 0.4 (0.2)   |
| Caenidae             | 9.3 (3.5)   | 5.1 (1.7)   | 3.7 (0.9)   | 3.1 (1.2)   | 2.9 (0.8)   | 4.8 (2.1)   | 2.5 (0.9)  | 2.4 (0.5) | 0.9 (0.4)   | 0.4 (0.2)   |
| Elmidae              | 4.5 (1.4)   | 3.7 (0.9)   | 1.9 (0.4)   | 1.3 (0.3)   | 1.5 (0.5)   | 3.1 (2.4)   | 2.5 (1.6)  | 2 (0.5)   | 1.5 (0.6)   | 0.6 (0.2)   |
| Culicidae            | 1.5 (0.8)   | 2.6 (0.8)   | 2.2 (0.5)   | 1.2 (0.2)   | 1.1 (0.3)   | 2.1 (0.7)   | 1.8 (0.5)  | 0.7 (0.2) | 1.1 (0.4)   | 0.2 (0.1)   |
| Hydropsychidae       | 1.1 (0.7)   | 0.5 (0.2)   | 0.5 (0.4)   | 0.5 (0.2)   | 0.1 (0.1)   | 0.7 (0.5)   | 0.6 (0.3)  | 0.7 (0.3) | 0.5 (0.2)   | 0.03 (0.02) |
| Ceratopogonidae      | 0.2 (0.1)   | 1.3 (0.7)   | 0.5 (0.4)   | 0.1 (0.1)   | 0.4 (0.2)   | 0.3 (0.2)   | 0 (0)      | 0.3 (0.2) | 0.05 (0.04) | 0 (0)       |
| Coenagrionidae       | 0 (0)       | 0.1 (0.1)   | 0.1 (0.1)   | 0.6 (0.4)   | 0.2 (0.08)  | 0 (0)       | 0 (0)      | 0.3 (0.2) | 0 (0)       | 0 (0)       |
| Libellulidae         | 0.3 (0.2)   | 0 (0)       | 0 (0)       | 0.06 (0.05) | 0.05 (0.04) | 0 (0)       | 0 (0)      | 0.3 (0.1) | 0 (0)       | 0 (0)       |
| Gyrinidae            | 0 (0)       | 0 (0)       | 0 (0)       | 0 (0)       | 0.1 (0.1)   | 0 (0)       | 0 (0)      | 0.3 (0.1) | 0.02 (0.01) | 0 (0)       |
| Leptoceridae         | 0.3 (0.2)   | 0 (0)       | 0 (0)       | 0 (0)       | 0 (0)       | 0 (0)       | 0 (0)      | 0.3 (0.2) | 0 (0)       | 0.1 (0.09)  |
| Hydraenidae          | 0 (0)       | 0 (0)       | 0 (0)       | 0 (0)       | 0.04 (0.04) | 0 (0)       | 0 (0)      | 0.3 (0.2) | 0 (0)       | v           |
| Pylalidae            | 0 (0)       | 0.2 (0.1)   | 0 (0)       | 0.1 (0.01)  | 0 (0)       | 0 (0)       | 0 (0)      | 0.3 (0.2) | 0 (0)       | 0 (0)       |
| Hydrophilidae        | 0 (0)       | 0 (0)       | 0 (0)       | 0 (0)       | 0 (0)       | 0 (0)       | 0 (0)      | 0.3 (0.2) | 0 (0)       | 0 (0)       |
| Helodidae            | 0 (0)       | 0 (0)       | 0 (0)       | 0.05 (0.05) | 0.1 (0.08)  | 0 (0)       | 0 (0)      | 0.3 (0.2) | 0 (0)       | 0 (0)       |
| Dysticidae           | 0 (0)       | 0 (0)       | 0 (0)       | 0 (0)       | 0 (0)       | 0 (0)       | 0.1 (0.1)  | 0.4 (0.2) | 0 (0)       | 0.09 (0.08) |
| Veliidae             | 0 (0)       | 0 (0)       | 0.02 (0.01) | 0 (0)       | 0 (0)       | 0 (0)       | 0 (0)      | 0.3 (0.2) | 0 (0)       | 0 (0)       |
| Tipulidae            | 0 (0)       | 0.08 (0.08) | 0 (0)       | 0 (0)       | 0 (0)       | 0 (0)       | 0.1 (0.1)  | 0.3 (0.2) | 0 (0)       | 0.03 (0.02) |
| Heptageniidae        | 0 (0)       | 0 (0)       | 0 (0)       | 0 (0)       | 0 (0)       | 0.08 (0.07) | 0 (0)      | 0.3 (0.2) | 0 (0)       | 0 (0)       |
| Dixidae              | 0 (0)       | 0 (0)       | 0 (0)       | 0 (0)       | 0 (0)       | 0 (0)       | 0 (0)      | 0.3 (0.2) | 0 (0)       | 0 (0)       |
| Aeshnidae            | 0 (0)       | 0 (0)       | 0 (0)       | 0 (0)       | 0 (0)       | 0 (0)       | 0 (0)      | 0.3 (0.2) | 0 (0)       | 0 (0)       |
| Others               | 10.1 (2.4)  | 5.3 (1.4)   | 5.9 (1.3)   | 4.1 (0.6)   | 2.6 (0.4)   | 10.1 (1.7)  | 0.4 (0.3)  | 3.4 (0.4) | 4.2 (1)     | 4.4 (0.5)   |
| Overall mean density | 3.6 (0.5)   | 2.1 (0.3)   | 1.8 (0.2)   | 1.6 (0.3)   | 1.1 (0.2)   | 2.5 (0.6)   | 1.3 (0.2)  | 1.2 (0.2) | 1.2 (0.2)   | 0.8 (0.1)   |
